# Supplementary material for: Formulation of Environmentally Safe Graffiti Remover Containing Esterified Plant Oils and Sugar Surfactant
Source: MDPI journal article supplement (doi:10.3390/molecules26154706), 2021-08-03
Supplement: s1 [file s1]

# SUPPLEMENTARY MATERIAL

Article

## Formulation of Environmentally Safe Graffiti Remover Containing Esterified Plant Oils and Sugar Surfactant

Marcin Bartman <sup>1</sup>, Sebastian Balicki <sup>1</sup> and Kazimiera A. Wilk <sup>1,\*</sup>

<sup>1</sup> Department of Engineering and Technology of Chemical Processes, Wrocław University of Science and Technology, Wybrzeże Wyspiańskiego 27, 50-370 Wrocław, Poland; marcin.bartman@pwr.edu.pl (M.B.); sebastian.balicki@pwr.edu.pl (S.B.); kazimiera.wilk@pwr.edu.pl (K.A.W.)

\* Correspondence: kazimiera.wilk@pwr.edu.pl; Tel. +48 71 320 2828; (K.A.W.)

### Table of Contents

**Table S1.** The speed of runoff eco-friendly graffiti remover from the surface. Each data point represents the mean  $\pm$  S.D.,  $n = 5$ .

**Table S2.** A reduced quadratic D-Optimal design experimental matrix of two independent variables with their corresponding values and analysed response factors  $Y_1 - Y_4$ : viscosity, density, runoff speed and effectiveness after 120 s, respectively.

**Table S3.** ANOVA results for D-optimal randomized design quadratic model, for dependent variables of graffiti remover formulations.

**Table S4.** D-optimal randomized design with corresponding independent variables and their coded value levels, for the preparation of graffiti remover formulation.

## Supplementary Tables

**Table S1.** The speed of runoff eco-friendly graffiti remover from the surface. Each data point represents the mean  $\pm$  S.D., n = 5.

| Formulation                | Runoff Speed,<br>(s) $\pm$ S.D.               | Runoff Speed,<br>(s) $\pm$ S.D. | Runoff Speed,<br>(s) $\pm$ S.D. |
|----------------------------|-----------------------------------------------|---------------------------------|---------------------------------|
| Type of Oil PEG-8 ester    | MG-400-RO                                     | MG-400-SO                       | MG-400-UCO                      |
| 1                          | 21 $\pm$ 1                                    | 20 $\pm$ 1                      | 20 $\pm$ 1                      |
| 2                          | 44 $\pm$ 2                                    | 25 $\pm$ 1                      | 45 $\pm$ 2                      |
| 3                          | 35 $\pm$ 2                                    | 40 $\pm$ 2                      | 34 $\pm$ 1                      |
| 4                          | 23 $\pm$ 1                                    | 28 $\pm$ 1                      | 21 $\pm$ 1                      |
| 5                          | 20 $\pm$ 1                                    | 24 $\pm$ 1                      | 19 $\pm$ 1                      |
| 6                          | 70 $\pm$ 3                                    | 100 $\pm$ 4                     | 73 $\pm$ 3                      |
| 7                          | 29 $\pm$ 1                                    | 30 $\pm$ 2                      | 31 $\pm$ 2                      |
| 8                          | 27 $\pm$ 2                                    | 33 $\pm$ 2                      | 25 $\pm$ 1                      |
| 9                          | 21 $\pm$ 1                                    | 28 $\pm$ 1                      | 24 $\pm$ 1                      |
| 10                         | 16 $\pm$ 1                                    | 26 $\pm$ 1                      | 19 $\pm$ 1                      |
| 11                         | 22 $\pm$ 1                                    | 34 $\pm$ 2                      | 25 $\pm$ 1                      |
| 12                         | 20 $\pm$ 1                                    | 25 $\pm$ 1                      | 23 $\pm$ 1                      |
| 13                         | 35 $\pm$ 2                                    | 41 $\pm$ 2                      | 35 $\pm$ 1                      |
| 14                         | 36 $\pm$ 2                                    | 27 $\pm$ 2                      | 37 $\pm$ 2                      |
| 15                         | 21 $\pm$ 1                                    | 25 $\pm$ 1                      | 20 $\pm$ 1                      |
| 16                         | 21 $\pm$ 1                                    | 105 $\pm$ 4                     | 72 $\pm$ 3                      |
| 17                         | 70 $\pm$ 3                                    | 27 $\pm$ 1                      | 74 $\pm$ 3                      |
| 18                         | 73 $\pm$ 3                                    | 28 $\pm$ 1                      | 24 $\pm$ 1                      |
| 19                         | 26 $\pm$ 2                                    | 21 $\pm$ 1                      | 74 $\pm$ 3                      |
| 20                         | 26 $\pm$ 2                                    | 17 $\pm$ 1                      | 24 $\pm$ 1                      |
| <b>Commercial product</b>  | <b>Runoff Speed (s) <math>\pm</math> S.D.</b> |                                 |                                 |
| Ref. 1. Extracion Gasoline | 5 $\pm$ 1                                     |                                 |                                 |
| Ref. 2. Nitro Solvent      | 5 $\pm$ 1                                     |                                 |                                 |

**Table S2.** A reduced quadratic D-Optimal design experimental matrix of two independent variables with their corresponding values and analysed response factors Y<sub>1</sub> – Y<sub>4</sub>: viscosity, density, runoff speed and effectiveness after 120 s, respectively.

| Run | Formulation<br>no. (A) | Type<br>of oil<br>(B) | Y <sub>1</sub> : viscosity<br>(mPa·s) | Y <sub>2</sub> : density<br>(g/cm <sup>3</sup> ) | Y <sub>3</sub> :<br>Runoff<br>speed<br>(s) | Y <sub>4</sub> :<br>effectiveness<br>(120 s) (%) |
|-----|------------------------|-----------------------|---------------------------------------|--------------------------------------------------|--------------------------------------------|--------------------------------------------------|
| 1   | 20                     | 1                     | 37.75                                 | 1.042                                            | 26                                         | 75                                               |
| 2   | 1                      | 2                     | 36.32                                 | 1.0259                                           | 20                                         | 75                                               |
| 3   | 11                     | 1                     | 20.2                                  | 1.0285                                           | 22                                         | 5                                                |
| 4   | 10                     | 2                     | 58.34                                 | 1.035                                            | 19                                         | 50                                               |
| 5   | 20                     | 3                     | 24.32                                 | 1.0409                                           | 17                                         | 42.5                                             |
| 6   | 1                      | 3                     | 48.18                                 | 1.0345                                           | 20                                         | 65                                               |
| 7   | 15                     | 2                     | 37.21                                 | 1.02                                             | 20                                         | 45                                               |
| 8   | 1                      | 3                     | 48.18                                 | 1.0345                                           | 20                                         | 65                                               |
| 9   | 13                     | 1                     | 41.15                                 | 1.038                                            | 35                                         | 35                                               |
| 10  | 1                      | 1                     | 33.76                                 | 1.0345                                           | 21                                         | 72.5                                             |
| 11  | 20                     | 3                     | 44.32                                 | 1.0409                                           | 17                                         | 42.5                                             |
| 12  | 1                      | 1                     | 33.76                                 | 1.0345                                           | 21                                         | 72.5                                             |
| 13  | 20                     | 1                     | 37.75                                 | 1.042                                            | 26                                         | 75                                               |

|    |    |   |       |        |    |      |
|----|----|---|-------|--------|----|------|
| 14 | 5  | 1 | 29.39 | 1.0323 | 20 | 45   |
| 15 | 7  | 3 | 25.97 | 1.0316 | 30 | 32.5 |
| 16 | 3  | 3 | 46.13 | 1.0331 | 40 | 35   |
| 17 | 20 | 2 | 45.53 | 1.0356 | 24 | 70   |
| 18 | 1  | 1 | 33.76 | 1.0345 | 21 | 72.5 |
| 19 | 15 | 3 | 26.15 | 1.0326 | 25 | 40   |
| 20 | 10 | 3 | 64.67 | 1.0421 | 26 | 40   |
| 21 | 17 | 1 | 20.21 | 1.0148 | 70 | 10   |
| 22 | 1  | 3 | 48.18 | 1.0345 | 20 | 65   |
| 23 | 20 | 2 | 45.53 | 1.0356 | 24 | 70   |
| 24 | 15 | 1 | 28.42 | 1.0297 | 21 | 47.5 |
| 25 | 1  | 2 | 36.32 | 1.0259 | 20 | 75   |
| 26 | 1  | 1 | 33.76 | 1.0345 | 21 | 72.5 |
| 27 | 12 | 2 | 22.47 | 1.023  | 23 | 5    |
| 28 | 12 | 3 | 25.86 | 1.0258 | 25 | 70   |
| 29 | 7  | 2 | 23.47 | 1.0246 | 31 | 40   |
| 30 | 1  | 3 | 48.18 | 1.0345 | 20 | 65   |

**Table S3.** ANOVA results for *D*-optimal randomized design quadratic model, for dependent variables of graffiti remover formulations.

| Source                                                                               | Sum of sq. | Term df | F-value | p-value |
|--------------------------------------------------------------------------------------|------------|---------|---------|---------|
| <i>dependent variable: viscosity</i>                                                 |            |         |         |         |
| Model                                                                                | 0.0010     | 5       | 3.56    | 0.0089  |
| A-Formulation                                                                        | 0.0010     | 1       | 0.7161  | 0.3880  |
| B-Type of oil                                                                        | 0.0003     | 1       | 4.62    | 0.0374  |
| AB                                                                                   | 0.0001     | 1       | 1.54    | 0.2218  |
| A <sup>2</sup>                                                                       | 0.0006     | 1       | 10.87   | 0.0020  |
| B <sup>2</sup>                                                                       | 2.804E-06  | 1       | 0.0484  | 0.8269  |
| Lack of fit                                                                          | 0.0024     | 30      | 5.25    | 0.0021  |
| S.D. = 0.0076, Mean = 0.0292, R <sup>2</sup> = 0.2979, Adj. R <sup>2</sup> = 0.2143  |            |         |         |         |
| Mathematical correlation between response factor and independent variables:          |            |         |         |         |
| $1/\text{Viscosity} = 0.0346 + 0.0012A - 0.0027B + 0.0019AB - 0.0094A^2 + 0.0005B^2$ |            |         |         |         |
| <i>dependent variable: density</i>                                                   |            |         |         |         |
| Model                                                                                | 0.0014     | 5       | 6.07    | 0.0003  |
| A-Formulation                                                                        | 0.0001     | 1       | 2.09    | 0.0961  |
| B-Type of oil                                                                        | 0.0000     | 1       | 0.3973  | 0.5319  |
| AB                                                                                   | 1.360E-06  | 1       | 0.0299  | 0.8635  |
| A <sup>2</sup>                                                                       | 0.0003     | 1       | 5.70    | 0.0215  |
| B <sup>2</sup>                                                                       | 0.0007     | 1       | 15.40   | 0.0003  |
| Lack of fit                                                                          | 0.0019     | 30      | 5.03    | 0.0032  |
| S.D. = 0.0067, Mean = 1.03, R <sup>2</sup> = 0.4196, Adj. R <sup>2</sup> = 0.3505    |            |         |         |         |
| Mathematical correlation between response factor and independent variables:          |            |         |         |         |
| $\text{Density} = 1.02 + 0.0021A - 0.0007B + 0.0002AB - 0.0060A^2 + 0.0084B^2$       |            |         |         |         |
| <i>dependent variable: runoff speed</i>                                              |            |         |         |         |
| Model                                                                                | 0.0030     | 11      | 3.99    | 0.0008  |
| A-Formulation                                                                        | 0.0002     | 1       | 3.14    | 0.0848  |
| B-Type of oil                                                                        | 0.0000     | 1       | 0.6433  | 0.4278  |
| AB                                                                                   | 0.0002     | 1       | 2.63    | 0.1135  |
| A <sup>2</sup>                                                                       | 0.0007     | 1       | 10.33   | 0.0028  |

|                                                                                                      |          |    |        |        |
|------------------------------------------------------------------------------------------------------|----------|----|--------|--------|
| B <sup>2</sup>                                                                                       | 0.0001   | 1  | 1.54   | 0.2225 |
| Lack of fit                                                                                          | 0.0024   | 24 | 5.25   | 0.0005 |
| S.D. = 0.0082, Mean = 0.0418, R <sup>2</sup> = 0.5495, Adj. R <sup>2</sup> = 0.4118                  |          |    |        |        |
| Mathematical correlation between response factor and independent variables:                          |          |    |        |        |
| 1/runoff speed = 0.0472 - 0.0120A - 0.0024B + 0.0117AB - 0.0538A <sup>2</sup> - 0.0059B <sup>2</sup> |          |    |        |        |
| <i>dependent variable: effectiveness (120 s)</i>                                                     |          |    |        |        |
| Model                                                                                                | 7692.82  | 5  | 4.64   | 0.0019 |
| A-Formulation                                                                                        | 82.52    | 1  | 0.2486 | 0.6206 |
| B-Type of oil                                                                                        | 1260.48  | 1  | 3.80   | 0.0580 |
| AB                                                                                                   | 206.22   | 1  | 0.6214 | 0.4350 |
| A <sup>2</sup>                                                                                       | 6012.43  | 1  | 18.12  | 0.0001 |
| B <sup>2</sup>                                                                                       | 1.84     | 1  | 0.0055 | 0.9410 |
| Lack of fit                                                                                          | 13938.93 | 30 | 4.75   | 0.0032 |
| S.D. = 18.22, Mean = 50.78, R <sup>2</sup> = 0.3556 Adj. R <sup>2</sup> = 0.2789                     |          |    |        |        |
| Mathematical correlation between response factor and independent variables:                          |          |    |        |        |
| effectiveness (120 s) = 32.75 - 1.63A - 5.96B - 2.94AB + 28.93A <sup>2</sup> - 0.4304B <sup>2</sup>  |          |    |        |        |

**Table S4.** D-optimal randomized design with corresponding independent variables and their coded value levels, for the preparation of graffiti remover formulation.

| independent variable | number of levels | value levels |               |
|----------------------|------------------|--------------|---------------|
|                      |                  | low value    | high value    |
| A: formulation no.   | 20               | No. 1        | No. 20        |
| B: type of oil       | 3                | 1 (rapeseed) | 3 (sunflower) |
